# Supplementary material for: Meso-tetra(4-sulfonatophenyl)porphyrin silver/Ag nanoparticles/graphene-phase C3N4 with a sandwich-like structure and double-faced active centers via two-step room-temperature photocatalytic synthesis for ractopamine detection
Source: Royal Society of Chemistry journal article supplement (doi:10.1039/d1na00130b), 2021-01-01
Supplement: d1na00130b1.pdf [file d1na00130b1.pdf]

Meso-tetra (4-sulfonatophenyl) porphyrin silver / Ag nanoparticles /  
graphene phase C<sub>3</sub>N<sub>4</sub> with a sandwich-like structure and double-faced  
active centers via two-step photocatalytic room-temperature synthesis for  
ractopamine detection

Xuehua Weng<sup>a,b</sup>, Huiling Ye<sup>a,b</sup>, Wenqiang Xie<sup>a,b</sup>, Meihui Ying<sup>a,b</sup>, Haibo Pan<sup>a,b,c\*</sup>, Min Du<sup>c</sup>

<sup>a</sup> National & Local Joint Biomedical Engineering Research Center on Photodynamics

Technology, Fuzhou, Fujian 350108, P. R. China

<sup>b</sup> College of Chemistry, Qishan Campus, Fuzhou University, Fuzhou, Fujian 350108,, China

<sup>c</sup> Fujian Key Lab of Medical Instrument and Pharmaceutical Technology, Fuzhou University,

Fuzhou, Fujian 350108, China

\*Corresponding authors

Telephone: 86-591- 22866127; Fax: 86-591-22866127

E-mail: hbpan@fzu.edu.cn (H. Pan)

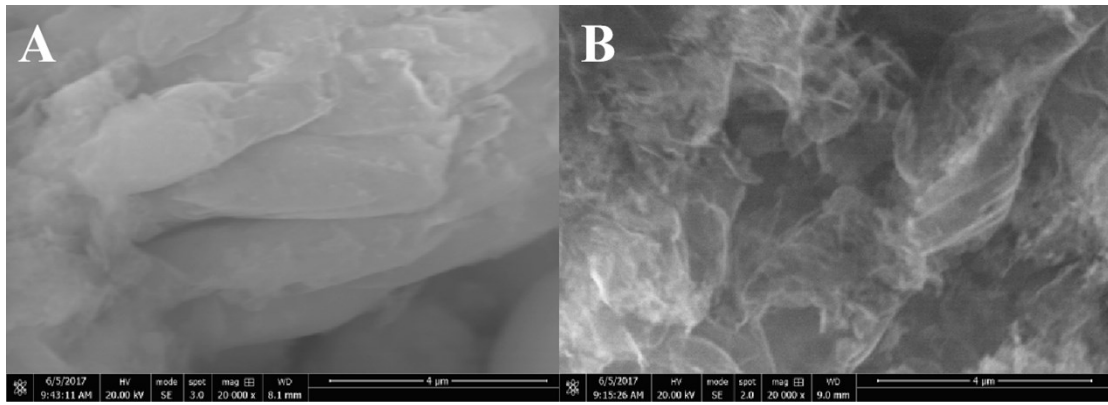

**Fig. S1** SEM images of (A) bulk g-C<sub>3</sub>N<sub>4</sub> and (B) ng-C<sub>3</sub>N<sub>4</sub>.

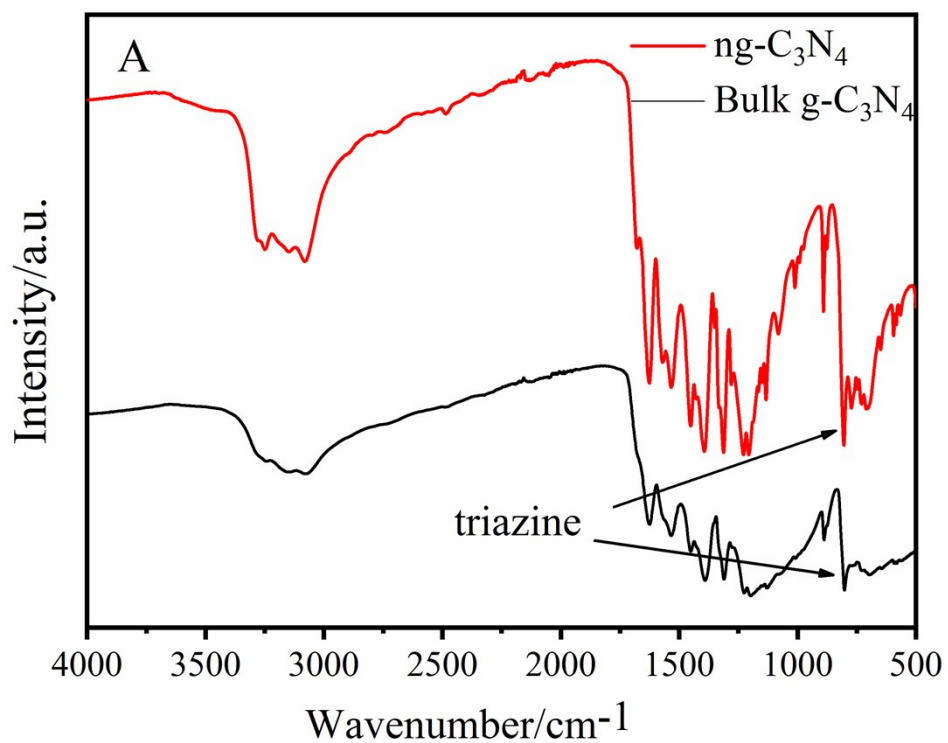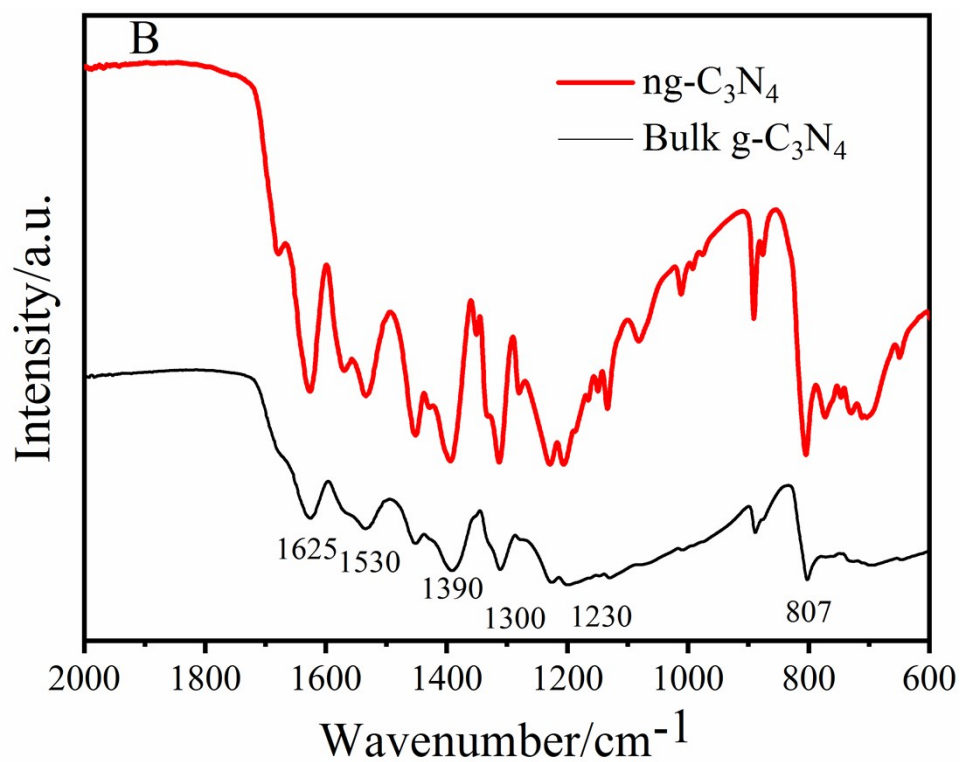

Fig. S2 FT-IR spectra of bulk g-C<sub>3</sub>N<sub>4</sub> and ng-C<sub>3</sub>N<sub>4</sub> (A: 4000-500cm<sup>-1</sup> and B: 2000-600cm<sup>-1</sup>).

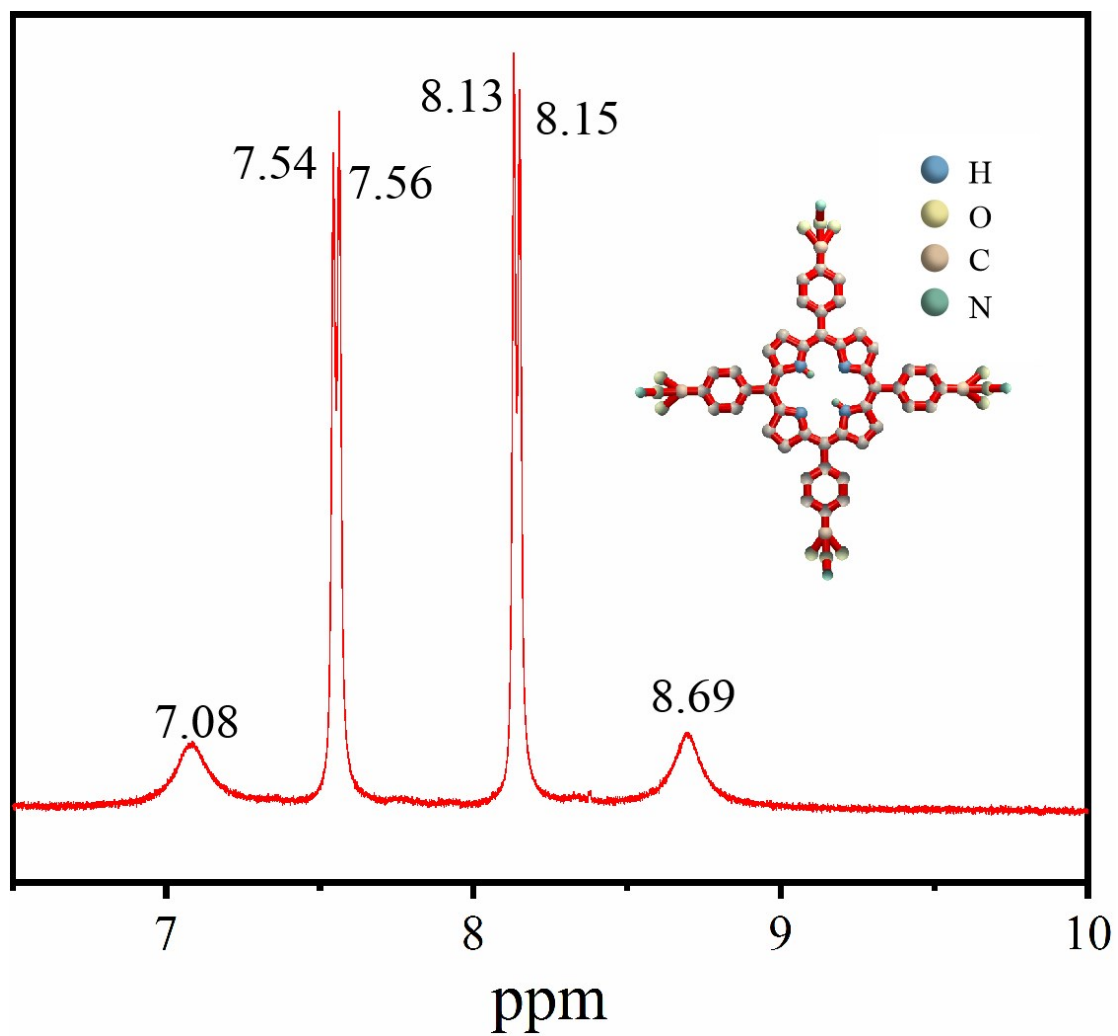

**Fig. S3**  $^1\text{H}$ NMR spectrum of  $\text{H}_2\text{TPPS}_4$  in  $\text{D}_2\text{O}$ , insert: molecular diagram of  $\text{H}_2\text{TPPS}_4$ .

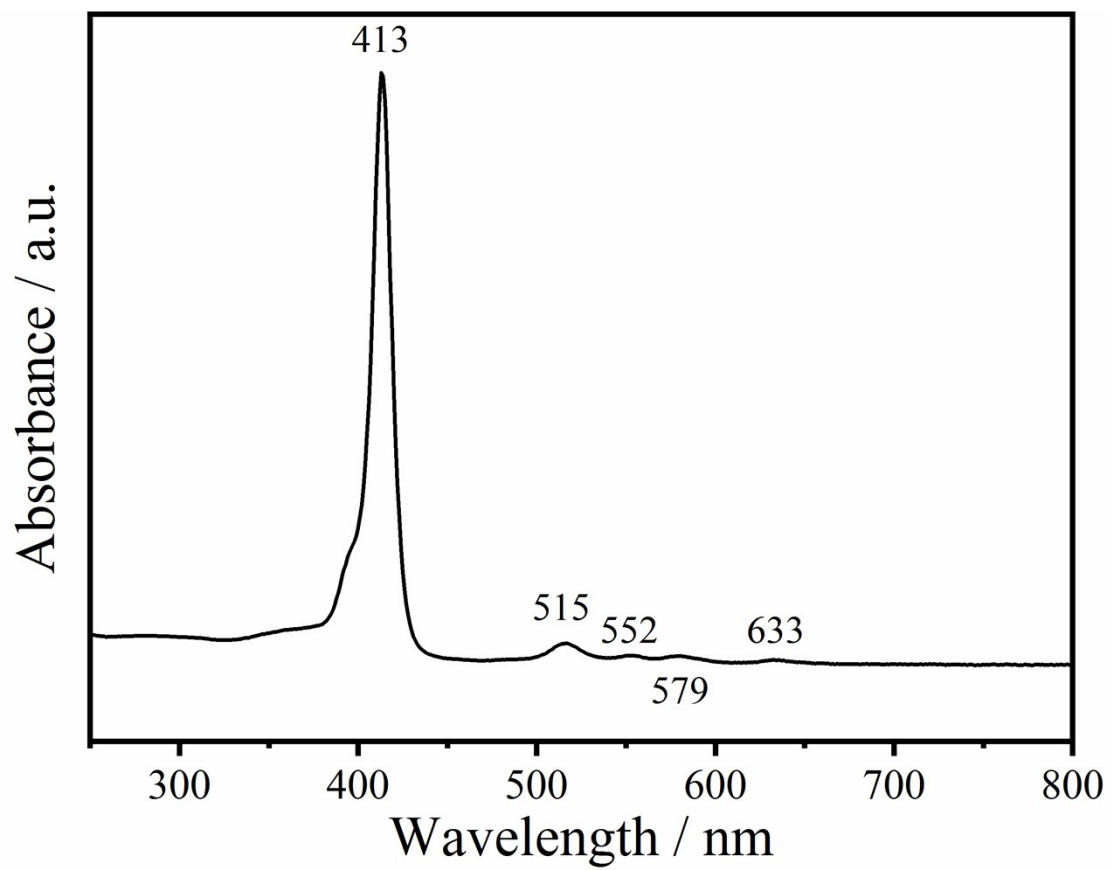

**Fig. S4** UV-vis spectrum of H<sub>2</sub>TPPS<sub>4</sub> in H<sub>2</sub>O.

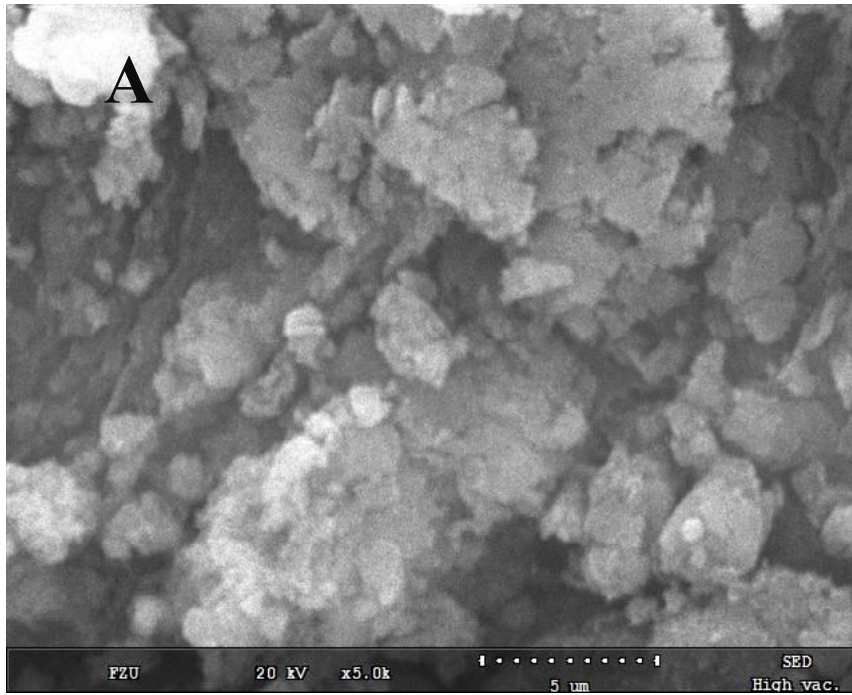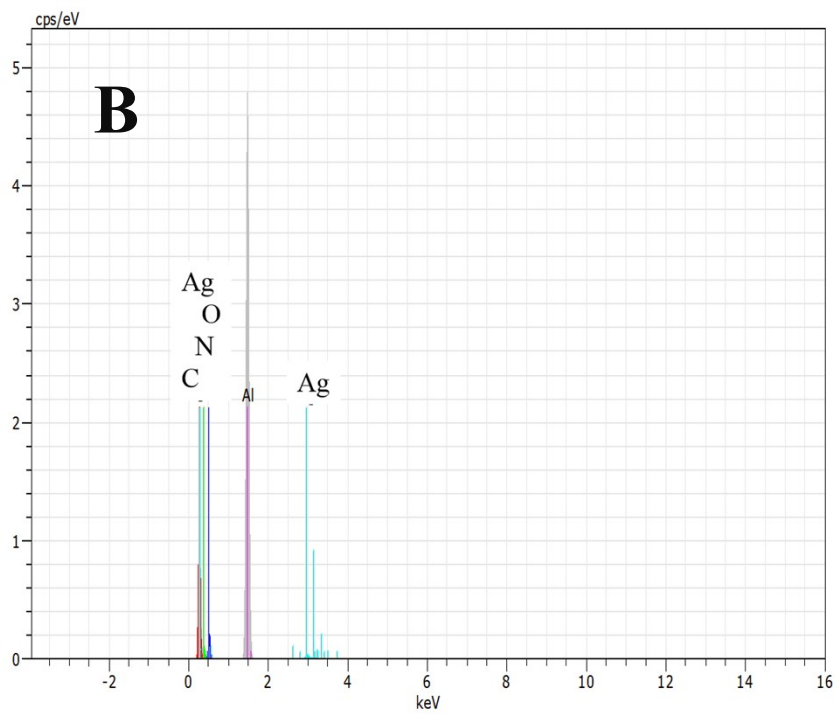

**Fig. S5** (A) SEM images and (B) EDS of Ag/ng-C<sub>3</sub>N<sub>4</sub>.

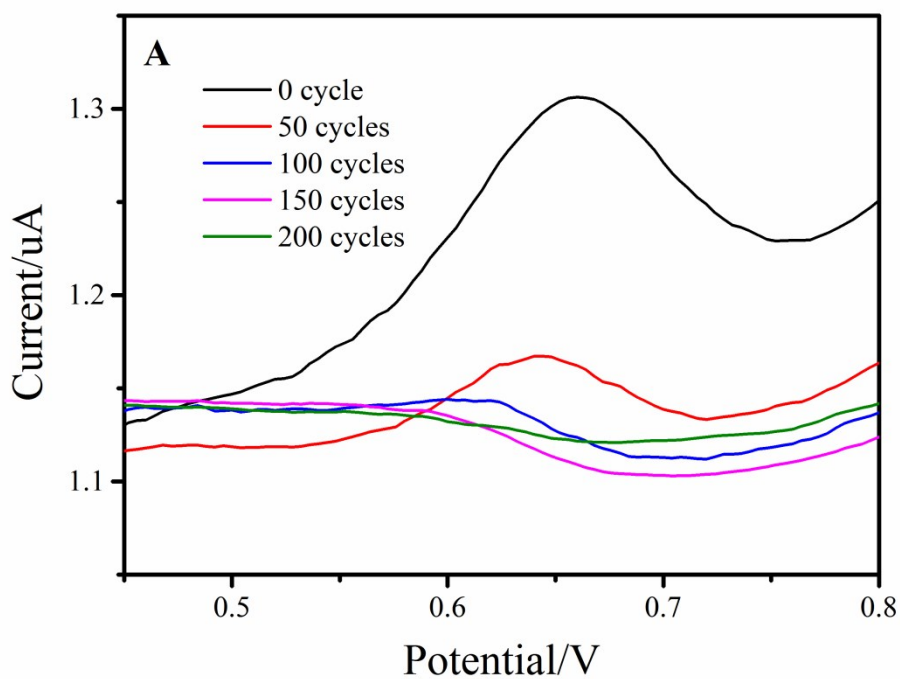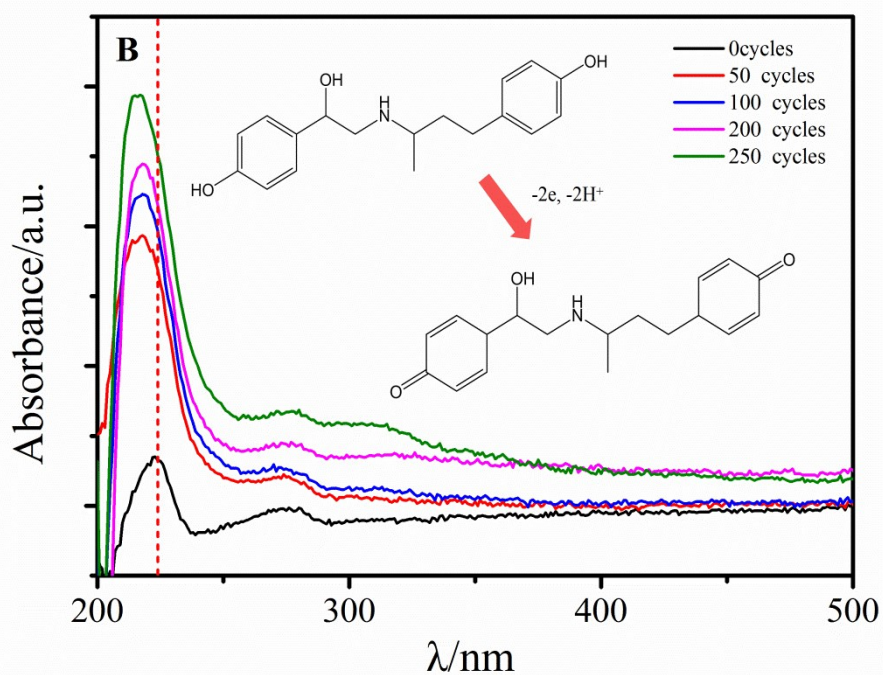

**Fig. S6** (A) DPV curves of  $\text{Ag}_2\text{TPPS}_4/\text{AgNPs}/\text{ng-C}_3\text{N}_4/\text{GCE}$  in pH 7.0 PBS with  $1 \times 10^{-6}$  M RAC.

(B) UV-vis spectra for RAC after oxidized cycles in pH 7.0 PBS.

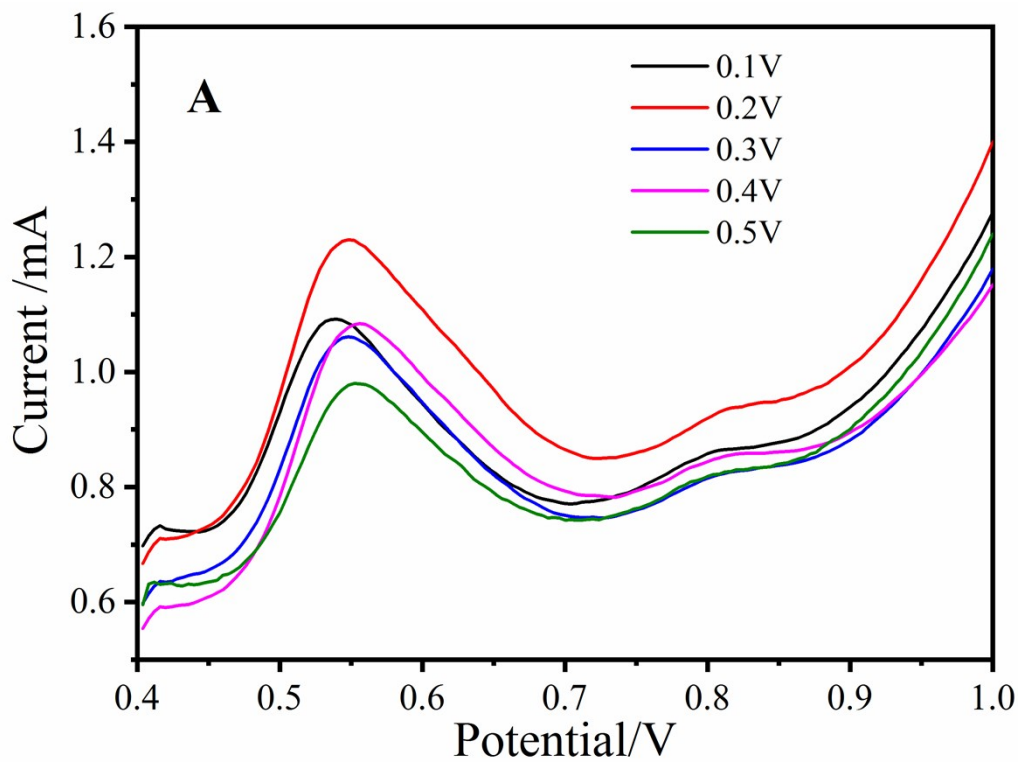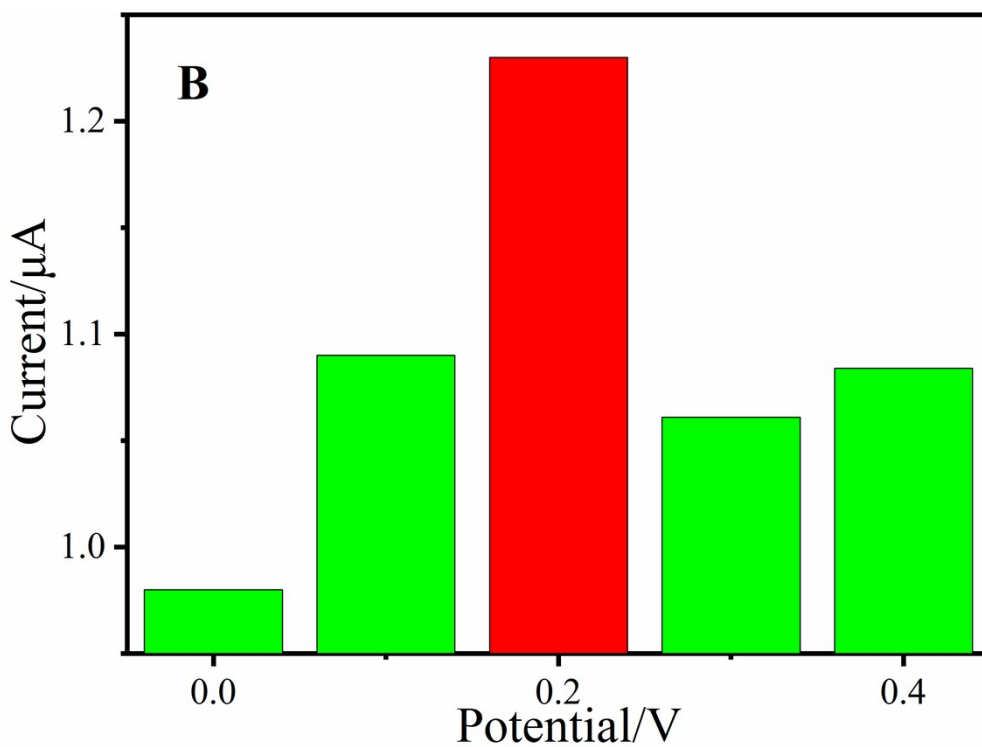

**Fig. S7** (A) DPV curves and (B) peak currents of  $1 \times 10^{-6}$  M RAC in PBS with accumulation potentials in the range of 0 to 0.4 V.



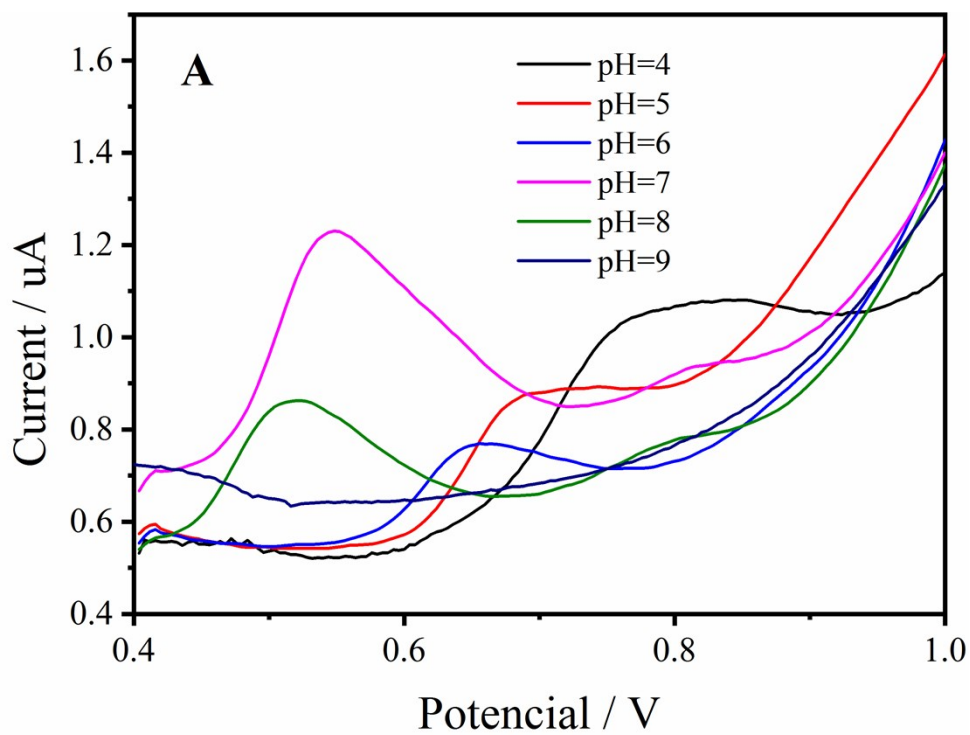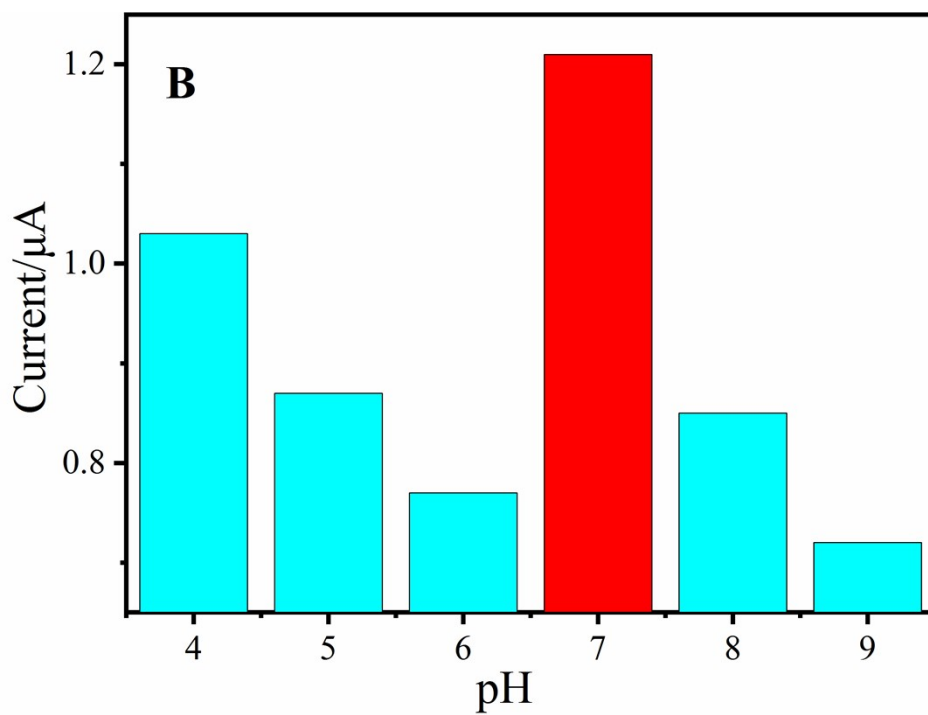

**Fig. S8** Effect of solution pH on (A) DPV and (B) electrochemical response of RAC ( $1 \times 10^{-6}$  M)

on  $\text{Ag}_2\text{TPPS}_4/\text{AgNPs}/\text{ng-C}_3\text{N}_4/\text{GCE}$ .

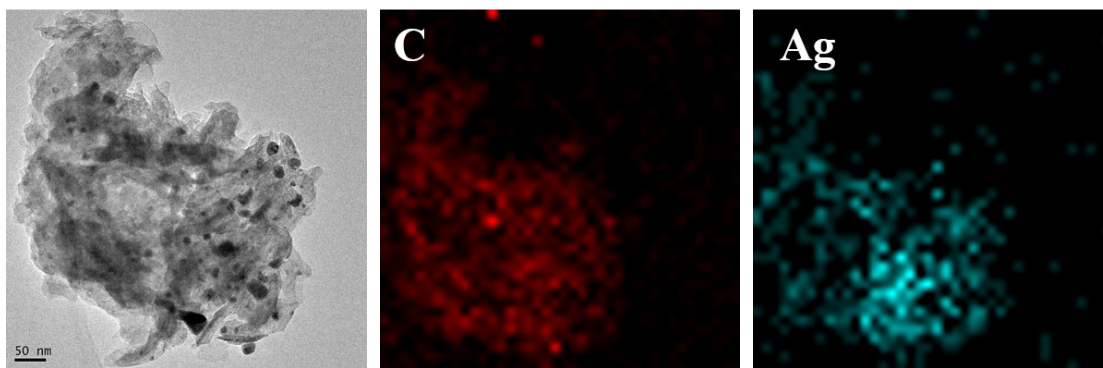

**Fig. S9** Elemental mapping of Ag<sub>2</sub>TPPS<sub>4</sub>/AgNPs/ng-C<sub>3</sub>N<sub>4</sub>/GCE.

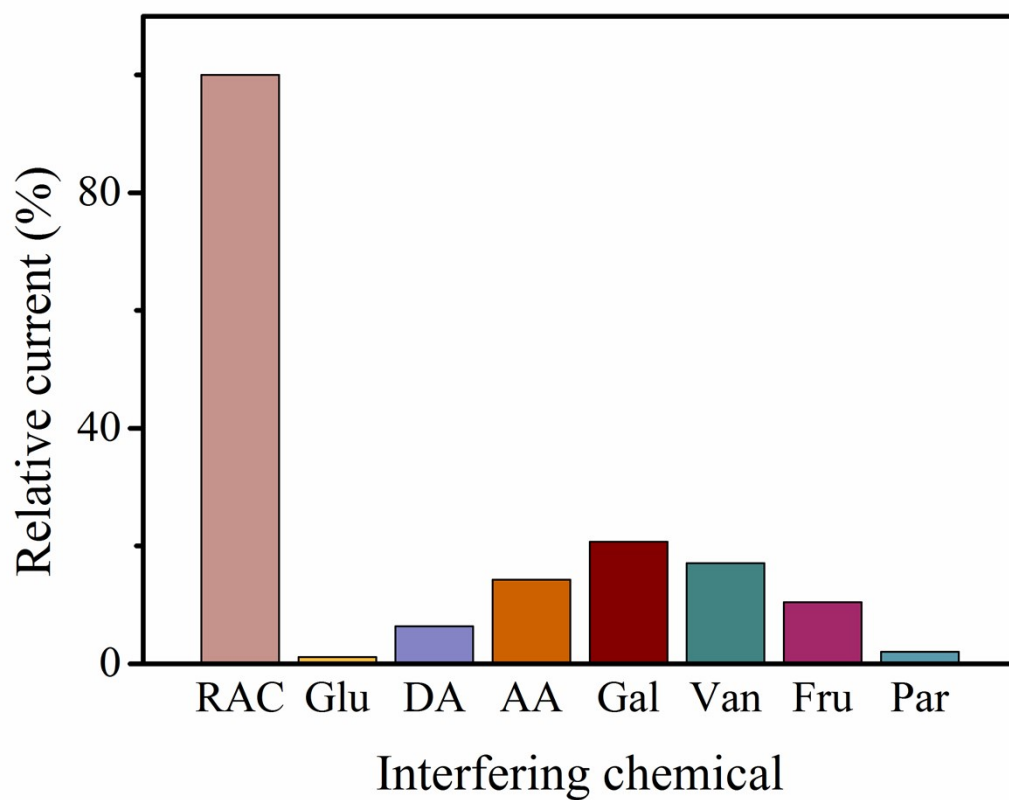

**Fig. S10** Current response of  $\text{Ag}_2\text{TPPS}_4/\text{AgNPs}/\text{ng-C}_3\text{N}_4/\text{GCE}$  in  $50 \mu\text{M}$  RAC with  $500 \mu\text{M}$  interferences.

**Table S1** Zeta potentials of Ag<sub>2</sub>TPPS<sub>4</sub>/AgNPs/ng-C<sub>3</sub>N<sub>4</sub>, AgNPs/ng-C<sub>3</sub>N<sub>4</sub>, RAC, AgNPs/ng-C<sub>3</sub>N<sub>4</sub>+RAC and Ag<sub>2</sub>TPPS<sub>4</sub>/AgNPs/ng-C<sub>3</sub>N<sub>4</sub>+RAC in H<sub>2</sub>O.

| Samples                                                                        | Zeta potential (mV) |
|--------------------------------------------------------------------------------|---------------------|
| AgNPs/ng-C <sub>3</sub> N <sub>4</sub>                                         | -2.13               |
| Ag <sub>2</sub> TPPS <sub>4</sub> /AgNPs/ng-C <sub>3</sub> N <sub>4</sub>      | -42.2               |
| RAC                                                                            | 1.26                |
| AgNPs/ng-C <sub>3</sub> N <sub>4</sub> +RAC                                    | 7.69                |
| Ag <sub>2</sub> TPPS <sub>4</sub> /AgNPs/ng-C <sub>3</sub> N <sub>4</sub> +RAC | -15.6               |

**Table S2** Comparison of analytical parameters for RAC oxidation atAg<sub>2</sub>TPPS<sub>4</sub>/AgNPs/ng-C<sub>3</sub>N<sub>4</sub> electrode with reported works.

| Methods                                                                   | Linear range (mol/L)                       | Limit of detection (mol/L) | Ref.      |
|---------------------------------------------------------------------------|--------------------------------------------|----------------------------|-----------|
| Bi <sub>2</sub> Te <sub>3</sub> @g-C <sub>3</sub> N <sub>4</sub> BNs      | $1.5 \times 10^{-8} - 4.56 \times 10^{-4}$ | $1.77 \times 10^{-9}$      | [1]       |
| Fe <sub>3</sub> O <sub>4</sub> -RGO                                       | $1.0 \times 10^{-5} - 1.0 \times 10^{-4}$  | $1.3 \times 10^{-8}$       | [2]       |
| NPVMO/ZrO <sub>2</sub>                                                    | $3.0 \times 10^{-6} - 5 \times 10^{-5}$    | $9.3 \times 10^{-7}$       | [3]       |
| quartz crystal microbalance                                               | $2.5 \times 10^{-6} - 1.5 \times 10^{-4}$  | $1.17 \times 10^{-6}$      | [4]       |
| OMC                                                                       | $8.5 \times 10^{-8} - 8 \times 10^{-6}$    | $6 \times 10^{-8}$         | [5]       |
| Ag <sub>2</sub> TPPS <sub>4</sub> /AgNPs/ng-C <sub>3</sub> N <sub>4</sub> | $1 \times 10^{-7} - 1.2 \times 10^{-5}$    | $5.1 \times 10^{-8}$       | This work |

**Table S3** Amount and recovery rate of RAC in milk samples.

| Samples | Added (nM) | Found (nM) | Recover (%) |
|---------|------------|------------|-------------|
| 1       | 5000       | 4952       | 99%         |
|         |            | 4762       | 95%         |
|         |            | 4619       | 92%         |
| 2       | 1000       | 1043       | 104%        |
|         |            | 1062       | 106%        |
|         |            | 990        | 99%         |
| 3       | 100        | 114        | 114%        |
|         |            | 110        | 110%        |
|         |            | 105        | 105%        |

## References

- 1 U. Rajaji, T. W. Chen, S. Chinnapaiyan, S.-M. Chen, M. Govindasamy, *Anal. Chim. Acta.*, 2020, **1125**, 220-230.
- 2 Y. Poo-arporn, S. Pakapongpan, N. Chanlek, R.P. Poo-arporn, *Sens. Actuators B Chem.*, 2019, **284**, 164-171.
- 3 L. Zhang, Q. Wang, Y. Qi, L. Li, S. Wang, X. Wang, *Sens. Actuators B Chem.*, 2019, **288**, 347-355.
- 4 L. J. Kong, M. F. Pan, G. Z. Fang, X. I. He, Y.-k. Yang, J. Dai, S. Wang, *Biosens. Bioelectron.*, 2014, **51**, 286-292.
- 5 X. Yang, B. Feng, P. Yang, Y. Ding, Y. Chen, J. Fei, *Food Chem.*, 2014, **145**, 619-624.
